# Supplementary material
Source: PubMed Central journal article supplement (PMC6028969)
Supplement: supp_RA118.002087_135539_1_supp_131476_p84kc5.pdf [file supp_RA118.002087_135539_1_supp_131476_p84kc5.pdf]

Supporting Information to

Stability of an aggregation-prone partially folded state of human profilin-1 correlates with aggregation propensity

**Edoardo Del Poggetto<sup>1</sup>, Angelo Toto<sup>2</sup>, Chiara Aloise<sup>1</sup>, Francesco Di Piro<sup>1</sup>, Ludovica Gori<sup>1</sup>, Francesco Malatesta<sup>2</sup>, Stefano Gianni<sup>2, 3</sup>, Fabrizio Chiti<sup>1</sup>, Francesco Bemporad<sup>1,\*</sup>**

From the <sup>1</sup>Department of Biomedical, Experimental and Clinical Sciences "Mario Serio", University of Florence, Viale G. B. Morgagni 50, 50134, Firenze (Italy); <sup>2</sup>Dipartimento di Scienze Biochimiche 'A. Rossi Fanelli', Sapienza University of Rome, 00185 Rome, Italy; <sup>3</sup>Istituto Pasteur - Fondazione Cenci Bolognetti and Istituto di Biologia e Patologia Molecolari del CNR;

\*To whom correspondence should be addressed: Francesco Bemporad, <sup>1</sup>Department of Biomedical, Experimental and Clinical Sciences "Mario Serio", University of Florence, Viale G. B. Morgagni 50, 50134, Firenze (Italy); [francesco.bemporad@unifi.it](mailto:francesco.bemporad@unifi.it); tel.: 0039-055-275-1211

**Supporting Table 1**

| denaturant                                      | Urea                          | GndHCl                        | GndSCN                        |
|-------------------------------------------------|-------------------------------|-------------------------------|-------------------------------|
| Equilibrium<br>$\Delta G_{U-F}^{H_2O}$ (KJ/mol) | 23.5 ± 2.0 <sup>§</sup>       | 23.5 ± 2.0 <sup>§</sup>       | 23.5 ± 2.0 <sup>§</sup>       |
| Equilibrium<br>$m$ (KJ/(mol · M))               | 7.7 ± 1.5                     | 22.8 ± 4.0                    | 48.8 ± 8.0                    |
| Equilibrium<br>$C_m$ (M)                        | 3.0 ± 0.3                     | 1.0 ± 0.2                     | 0.48 ± 0.05                   |
| Kinetic<br>$\Delta G_{U-F}^{H_2O}$ (KJ/mol)     | 25.8 ± 2.0 <sup>§§</sup>      | 25.8 ± 2.0 <sup>§§</sup>      | 25.8 ± 2.0 <sup>§§</sup>      |
| Kinetic<br>$\Delta G_{U-PF}^{H_2O}$ (KJ/mol)    | 3.4 ± 2.0 <sup>§§§</sup>      | 3.4 ± 2.0 <sup>§§§</sup>      | 3.4 ± 2.0 <sup>§§§</sup>      |
| Kinetic<br>$m$ (KJ/(mol · M))                   | 8.2 ± 1.5                     | 20.5 ± 4.0                    | 44.0 ± 8.0                    |
| Kinetic<br>$C_m$ (M)                            | 3.1 ± 0.3                     | 1.3 ± 0.2                     | 0.59 ± 0.06                   |
| Kinetic<br>$k_{F1}^{H_2O}$ (s <sup>-1</sup> )   | 1490 ± 70 <sup>*</sup>        | 1490 ± 70 <sup>*</sup>        | 1490 ± 70 <sup>*</sup>        |
| Kinetic<br>$k_{U1}^{H_2O}$ (s <sup>-1</sup> )   | 400 ± 40 <sup>**</sup>        | 400 ± 40 <sup>**</sup>        | 400 ± 40 <sup>**</sup>        |
| Kinetic<br>$k_{F2}^{H_2O}$ (s <sup>-1</sup> )   | 2.34 ± 0.1 <sup>***</sup>     | 2.34 ± 0.1 <sup>***</sup>     | 2.34 ± 0.1 <sup>***</sup>     |
| Kinetic<br>$k_{U2}^{H_2O}$ (s <sup>-1</sup> )   | 0.0004 ± 0.00004 <sup>+</sup> | 0.0004 ± 0.00004 <sup>+</sup> | 0.0004 ± 0.00004 <sup>+</sup> |
| Kinetic<br>$m_{F1}$ (KJ/(mol · M))              | -1.31 ± 0.13 <sup>++</sup>    | -1.31 ± 0.13 <sup>++</sup>    | -1.31 ± 0.13 <sup>++</sup>    |
| Kinetic<br>$m_{U1}$ (KJ/(mol · M))              | 0.26 ± 0.03 <sup>+++</sup>    | 0.26 ± 0.03 <sup>+++</sup>    | 0.26 ± 0.03 <sup>+++</sup>    |
| Kinetic<br>$m_{F2}$ (KJ/(mol · M))              | -4.30 ± 0.23                  | -10.80 ± 0.36                 | -23.80 ± 0.29                 |
| Kinetic<br>$m_{U2}$ (KJ/(mol · M))              | 2.29 ± 0.05                   | 8.10 ± 0.05                   | 18.59 ± 0.18                  |

§, \*, \*\*, \*\*\*, +, ++, +++ These sets of parameters were shared in the fitting procedure performed as described in the Data analysis section in the main text. Experimental conditions were 37 °C in a 50 mM phosphate buffer with 150 mM NaCl at pH 7.4; final profilin-1 concentration was 2.65 μM in the stopped-flow experiments and 29.1 μM in T-jump relaxation kinetics.

§§  $\Delta G_{U-F}^{H_2O}$  was calculated as  $\Delta G_{U-F}^{H_2O} = -R \cdot T \cdot \ln \left( \frac{k_{F1}^{H_2O} \cdot k_{F2}^{H_2O}}{k_{U1}^{H_2O} \cdot k_{U2}^{H_2O}} \right)$

§§§  $\Delta G_{U-PF}^{H_2O}$  was calculated as  $\Delta G_{U-PF}^{H_2O} = -R \cdot T \cdot \ln \left( \frac{k_{F1}^{H_2O}}{k_{U1}^{H_2O}} \right)$

**Supporting Table 2**

| parameter                                             |       | pH = 7.4                         | pH = 6.5                         | pH = 5.5                         | pH = 4.5                         | pH = 4.0                         | pH = 3.5                         |
|-------------------------------------------------------|-------|----------------------------------|----------------------------------|----------------------------------|----------------------------------|----------------------------------|----------------------------------|
| Equilibrium<br>$\Delta G_{U-F}^{H_2O}$<br>(KJ/mol)    | WT    | 26.5 ± 2.5                       | 26.5 ± 2.5                       | 23.7 ± 2.5                       | 21.1 ± 2.5                       | 11.7 ± 2.5                       | 4.2 ± 2.5                        |
|                                                       | G118V | 17.1 ± 2.5                       | 17.6 ± 2.5                       | 12.9 ± 2.5                       | 10.1 ± 2.5                       | 2.5 ± 2.5                        | -                                |
| Equilibrium<br>$m_{eq}$<br>(KJ/(mol · M))             | WT    | 7.59 ± 0.50                      | 8.33 ± 0.50                      | 9.16 ± 0.50                      | 9.99 ± 0.50                      | 10.4 ± 0.50                      | 10.9 ± 0.50                      |
|                                                       | G118V | 7.59 ± 0.50                      | 8.33 ± 0.50                      | 9.16 ± 0.50                      | 9.99 ± 0.50                      | 10.4 ± 0.50                      | 10.9 ± 0.50                      |
| Equilibrium<br>$C_m$<br>(M)                           | WT    | 3.49 ± 0.20                      | 3.18 ± 0.20                      | 2.59 ± 0.20                      | 2.11 ± 0.20                      | 1.12 ± 0.20                      | 0.38 ± 0.20                      |
|                                                       | G118V | 2.25 ± 0.20                      | 2.11 ± 0.20                      | 1.41 ± 0.20                      | 1.01 ± 0.20                      | 0.24 ± 0.20                      | -                                |
| Kinetic<br>$k_{F2}^{H_2O}$<br>(s <sup>-1</sup> )      | WT    | 1.73 ± 0.17                      | 3.55 ± 0.36                      | 3.80 ± 0.38                      | 2.27 ± 0.23                      | 1.11 ± 0.11                      | 0.94 ± 0.09                      |
|                                                       | G118V | 1.29 ± 0.13                      | 2.60 ± 0.26                      | 2.81 ± 0.28                      | 2.60 ± 0.26                      | 1.93 ± 0.19                      | -                                |
| Kinetic<br>$k_{U2}^{H_2O}$<br>(s <sup>-1</sup> )      | WT    | (3.94 ± 0.39) · 10 <sup>-5</sup> | (8.08 ± 0.81) · 10 <sup>-5</sup> | (2.68 ± 0.27) · 10 <sup>-4</sup> | (4.57 ± 0.46) · 10 <sup>-4</sup> | (9.99 ± 1.00) · 10 <sup>-3</sup> | (1.76 ± 0.17) · 10 <sup>-1</sup> |
|                                                       | G118V | (1.31 ± 0.13) · 10 <sup>-3</sup> | (2.15 ± 0.22) · 10 <sup>-3</sup> | (1.55 ± 0.16) · 10 <sup>-2</sup> | (4.35 ± 0.44) · 10 <sup>-2</sup> | (6.95 ± 0.70) · 10 <sup>-1</sup> | -                                |
| Extrapolated<br>$k_{U2}^{H_2O}$<br>(s <sup>-1</sup> ) | WT    | (4.54 ± 0.45) · 10 <sup>-5</sup> | (1.76 ± 0.18) · 10 <sup>-4</sup> | (9.91 ± 0.99) · 10 <sup>-4</sup> | (1.25 ± 0.12) · 10 <sup>-3</sup> | (2.03 ± 0.20) · 10 <sup>-3</sup> | (1.60 ± 0.16) · 10 <sup>-1</sup> |
|                                                       | G118V | (1.70 ± 0.17) · 10 <sup>-2</sup> | (1.59 ± 0.16) · 10 <sup>-1</sup> | (7.59 ± 0.76) · 10 <sup>-1</sup> | (4.88 ± 0.49) · 10 <sup>-2</sup> | (8.36 ± 0.84) · 10 <sup>-1</sup> | -                                |
| Calculated<br>$k_{F2}^{H_2O}$<br>(s <sup>-1</sup> )   | WT    | 1.99 ± 0.20                      | 7.73 ± 0.77                      | 14.1 ± 0.14                      | 6.19 ± 0.62                      | 0.23 ± 0.02                      | 0.85 ± 0.08                      |
|                                                       | G118V | 16.8 ± 0.17                      | 193 ± 19                         | 138 ± 14                         | 2.92 ± 0.29                      | 2.32 ± 0.23                      | -                                |
| Calculated<br>$\Delta G_{U-PF}^{H_2O}$<br>(KJ/mol)    | WT    | 0.35 ± 2.50                      | 1.93 ± 2.50                      | 3.24 ± 2.50                      | 2.48 ± 2.50                      | -3.92 ± 2.50                     | -2.40 ± 2.50                     |
|                                                       | G118V | 6.36 ± 2.50                      | 10.7 ± 2.50                      | 9.65 ± 2.50                      | 0.29 ± 2.50                      | 0.458 ± 2.50                     | -                                |
| Kinetic<br>$m_{F2}$<br>(KJ/(mol · M))                 | WT    | 5.22 ± 0.50                      | 5.01 ± 0.50                      | 5.52 ± 0.50                      | 5.47 ± 0.50                      | 6.85 ± 0.50                      | 9.92 ± 0.50                      |
|                                                       | G118V | 3.72 ± 0.50                      | 3.40 ± 0.50                      | 3.87 ± 0.50                      | 7.43 ± 0.50                      | 8.71 ± 0.50                      | -                                |
| Kinetic<br>$m_{U2}$<br>(KJ/(mol · M))                 | WT    | 2.37 ± 0.50                      | 3.32 ± 0.50                      | 3.64 ± 0.50                      | 4.52 ± 0.50                      | 3.55 ± 0.50                      | 0.98 ± 0.50                      |
|                                                       | G118V | 4.22 ± 0.50                      | 4.93 ± 0.50                      | 5.29 ± 0.50                      | 2.56 ± 0.50                      | 1.69 ± 0.50                      | -                                |
| <b>b</b>                                              | WT    | 0.14 ± 0.01                      | 0.003 ± 0.003                    | -0.11 ± 0.01                     | -0.49 ± 0.05                     | -0.74 ± 0.07                     | 1.32 ± 0.13                      |
|                                                       | G118V | 1.14 ± 0.10                      | 1.25 ± 0.12                      | 1.43 ± 0.14                      | 5.94 ± 0.60                      | 5.79 ± 0.058                     | -                                |
| <b>c</b>                                              | WT    | 0.04 ± 0.05                      | -0.07 ± 0.05                     | -0.09 ± 0.05                     | -0.09 ± 0.05                     | 0.00 ± 0.05                      | -0.04 ± 0.05                     |
|                                                       | G118V | -0.12 ± 0.05                     | -0.24 ± 0.05                     | -0.35 ± 0.05                     | -0.02 ± 0.05                     | 0.00 ± 0.05                      | -                                |

Experimental conditions were 2.65 μM profilin-1 in 10 mM buffers with an ionic strength of 30 mM achieved using NaCl and 25 °C. Buffers employed were TRIS (pH 7.4), MES (pH 6.5), acetate (pH 5.5, 4.5 and 4.0), formate (pH 3.5).

**Supporting Table 3**

| variant                                                | WT                               | A20T                             | C71G                             | M114T                            | E117G                            | G118V                            | Q139L                            |
|--------------------------------------------------------|----------------------------------|----------------------------------|----------------------------------|----------------------------------|----------------------------------|----------------------------------|----------------------------------|
| Equilibrium<br>$\Delta G_{U-F}^{H_2O}$<br>(KJ/mol)     | 26.2 ± 0.6 <sup>1</sup>          | 19.8 ± 0.4 <sup>2</sup>          | 23.8 ± 0.2 <sup>3</sup>          | 15.7 ± 0.2 <sup>3</sup>          | 26.9 ± 0.1 <sup>3</sup>          | 18.0 ± 0.2 <sup>3</sup>          | 33.9 ± 0.3 <sup>2</sup>          |
| Equilibrium<br>$m_{eq}$<br>(KJ/(mol · M))              | 7.3 ± 0.2 <sup>1</sup>           | 10.6 ± 0.2 <sup>2</sup>          | 6.7 ± 0.1 <sup>3</sup>           | 8.4 ± 0.1 <sup>3</sup>           | 8.2 ± 0.1 <sup>3</sup>           | 8.0 ± 0.1 <sup>1</sup>           | 9.4 ± 0.1 <sup>2</sup>           |
| Equilibrium<br>$C_m$<br>(M)                            | 3.57 ± 0.01 <sup>1</sup>         | 1.87 ± 0.01 <sup>2</sup>         | 3.57 ± 0.01 <sup>3</sup>         | 1.86 ± 0.01 <sup>3</sup>         | 3.26 ± 0.01 <sup>3</sup>         | 2.25 ± 0.01 <sup>1</sup>         | 3.59 ± 0.01 <sup>2</sup>         |
| Kinetic<br>$k_{F2}^{H_2O}$<br>(s <sup>-1</sup> )       | 1.02                             | 3.86                             | 1.10                             | 0.48                             | 2.36                             | 1.13                             | 4.85                             |
| Kinetic<br>$k_{U2}^{H_2O}$<br>(s <sup>-1</sup> )       | (1.48 ± 0.15) · 10 <sup>-5</sup> | (4.52 ± 0.45) · 10 <sup>-4</sup> | (4.74 ± 0.47) · 10 <sup>-3</sup> | (9.52 ± 0.95) · 10 <sup>-4</sup> | (5.88 ± 0.59) · 10 <sup>-5</sup> | (1.68 ± 0.17) · 10 <sup>-3</sup> | (2.00 ± 0.20) · 10 <sup>-6</sup> |
| Extrapolated<br>$k_{U2}^{H_2O'}$<br>(s <sup>-1</sup> ) | (1.70 ± 0.17) · 10 <sup>-5</sup> | (6.90 ± 0.69) · 10 <sup>-3</sup> | (9.20 ± 0.92) · 10 <sup>-2</sup> | (4.10 ± 0.41) · 10 <sup>-3</sup> | (1.41 ± 0.14) · 10 <sup>-4</sup> | (2.19 ± 0.22) · 10 <sup>-2</sup> | (6.11 ± 0.41) · 10 <sup>-6</sup> |
| Calculated<br>$\Delta G_{U-PF}^{H_2O}$<br>(KJ/mol)     | 0.34 ± 0.50                      | 6.76 ± 0.50                      | 7.35 ± 0.50                      | 3.62 ± 0.50                      | 2.17 ± 0.50                      | 6.36 ± 0.50                      | 2.77 ± 0.50                      |
| $\beta_T^1$                                            | 0.59 ± 0.02 <sup>4</sup>         |
| $\beta_T^2$                                            | 0.79 ± 0.03 <sup>5</sup>         |
| <b>ThT fluorescence (a.u.)</b>                         | 14.77 ± 1.48 <sup>3</sup>        | 68.49 ± 6.85 <sup>2</sup>        | 72.11 ± 7.00 <sup>3</sup>        | 30.48 ± 3.00 <sup>3</sup>        | 18.09 ± 2.00 <sup>3</sup>        | 53.71 ± 5.00 <sup>3</sup>        | 21.76 ± 2.18 <sup>2</sup>        |

<sup>1</sup> Data from (1);

<sup>2</sup> Data from (2);

<sup>3</sup> Data from (3);

<sup>4,5</sup> These parameters were shared in the fitting procedure;

Experimental conditions were 2.65 μM profilin-1 in 20 mM TRIS, 2 mM DTT, 0.1 mM CaCl<sub>2</sub>, 0.2 mM NaN<sub>3</sub>, pH 7.3, 25 °C.

### Supporting Figure 1 WT

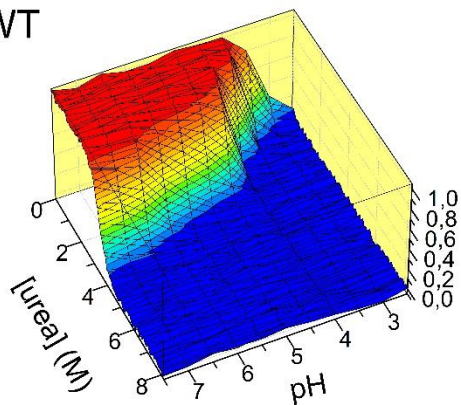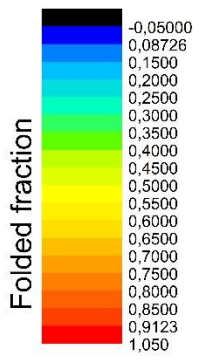

### G118V

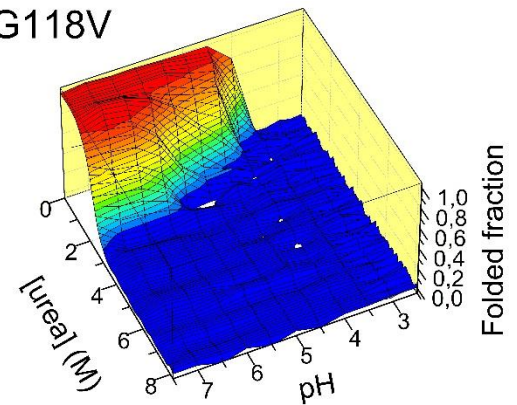

Supporting Figure 1: Fraction of folded profilin-1 as a function of urea concentration and pH. Data are shown for the WT (left) and G118V (right) variants.

## Supporting Figure 2

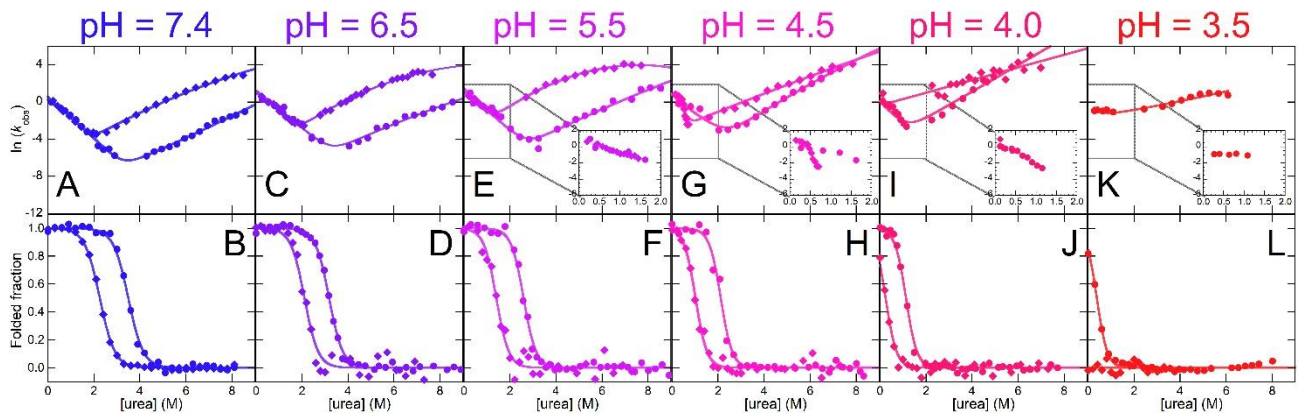

Supporting Figure 2: Chevron plots (A, C, E, G, I, K) and equilibrium unfolding curves (B, D, F, H, J, L) for WT (circles) and G118V (diamonds) profilin-1, carried out at pH of 7.4 (A, B), 6.5 (C, D), 5.5 (E, F), 4.5 (G, H), 4.0 (I, J) and 3.4 (K, L). Colour varies from blue to red as pH decreases from 7.0 to 3.5, following the same colour scale shown in Figure 4 (main text). Panels E, G, I, K report an inset with zooms at urea concentrations ranging from 0 to 2 M urea, in order to show down-ward curvatures in the refolding limbs of the chevron plots. Continuous lines in panels A, C, E, G, I, K represent best fits to equation (1) (see Data analysis section in main text). Continuous lines in panels B, D, F, H, J, L represent best fits to the equation edited by Santoro & Bolen (4).

### Supporting Figure 3

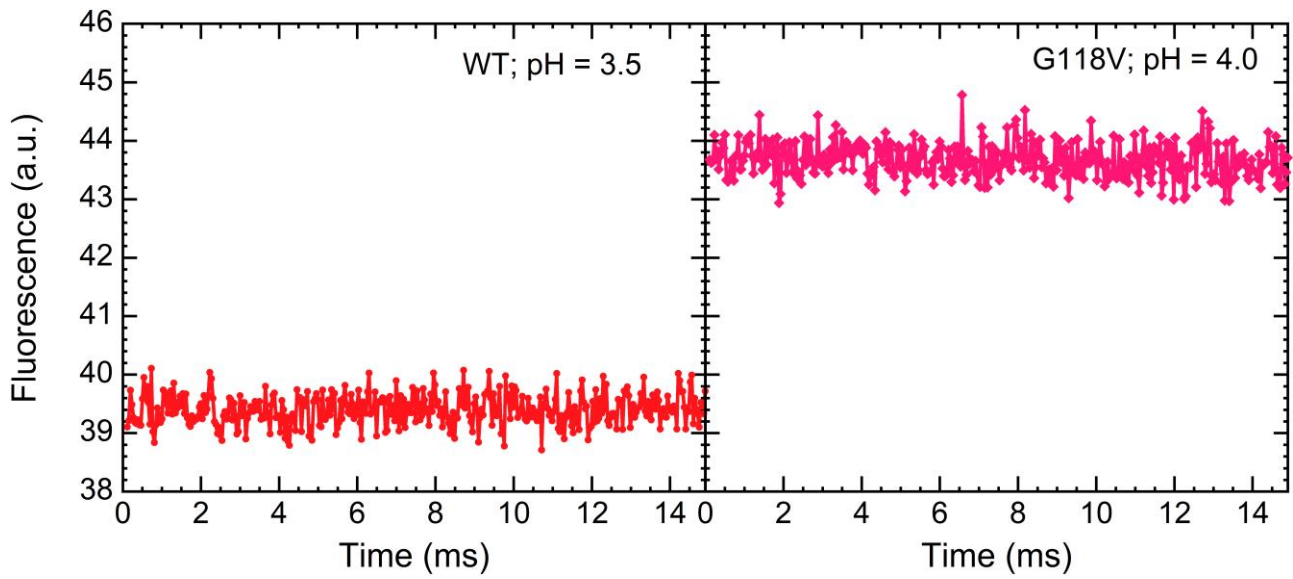

Supporting Figure 3: T-jump experiment of WT (left) and G118V (G118V) profilin-1, carried out in the absence of denaturant at pH 3.5 (10 mM formate buffer with 100 mM NaCl) for WT and at pH 4.0 (10 mM acetate buffer with 100 mM NaCl) for G118V. Each trace is the average of 20 measurements.

## Supporting Figure 4

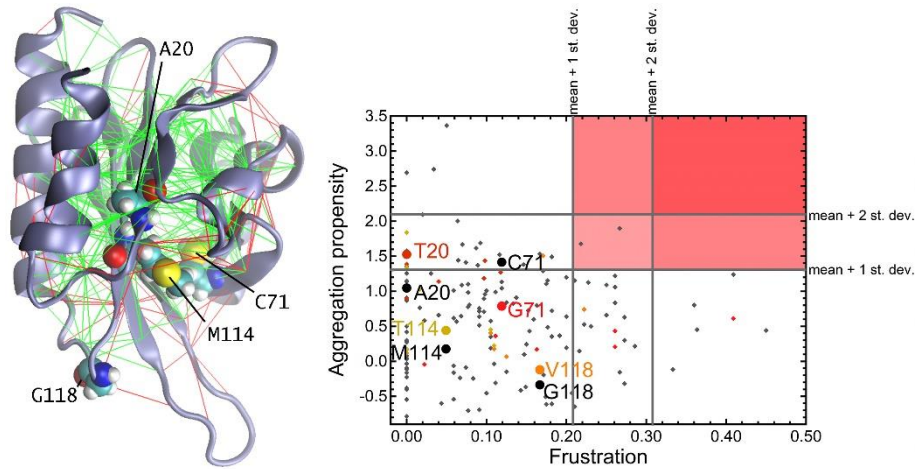

Supporting Figure 4: Comparison between frustration and aggregation propensity of profilin-1. We calculated frustration with Protein frustratometer 2 (5) and aggregation propensity with the Zyggregator method (6). Frustrated and non-frustrated contacts are represented as red and green lines in the profilin-1 structure (PDB code 1PFL) on the left-hand side. The right-hand panel shows the correlation between frustration and aggregation propensity. Each position of the sequence is represented as a grey diamond. The residues that involve the most amyloidogenic mutations studied here are represented as black circles. The effect of the mutations C71G, A20T, G118V and M114T are depicted in red, dark orange, orange and yellow respectively (circles for the mutated residues, diamonds for nearby residues). The continuous lines correspond to the values of the average + 1 and 2 standard deviations. These boundaries illustrate that no residues exceedingly frustrated and aggregation-prone (pink regions) there exist in the profilin-1 sequence.



## Supporting References

1. Del Poggetto, E., Chiti, F., and Bemporad, F. (2015) The Folding process of Human Profilin-1, a novel protein associated with familial amyotrophic lateral sclerosis. *Sci. Rep.* **5**, 12332
2. Del Poggetto, E., Gori, L., and Chiti, F. (2016) Biophysical analysis of three novel profilin-1 variants associated with amyotrophic lateral sclerosis indicates a correlation between their aggregation propensity and the structural features of their globular state. *Biol. Chem.* **397**, 927-937
3. Del Poggetto, E., Bemporad, F., Tatini, F., and Chiti, F. (2015) Mutations of Profilin-1 Associated with Amyotrophic Lateral Sclerosis Promote Aggregation Due to Structural Changes of Its Native State. *ACS Chem. Biol.* **10**, 2553-2563
4. Santoro, M. M., and Bolen, D. W. (1988) Unfolding free energy changes determined by the linear extrapolation method. 1. Unfolding of phenylmethanesulfonyl alpha-chymotrypsin using different denaturants. *Biochemistry* **27**, 8063-8068
5. Parra, R. G., Schafer, N. P., Radusky, L. G., Tsai, M. Y., Guzovsky, A. B., Wolynes, P. G., and Ferreiro, D. U. (2016) Protein Frustratometer 2: a tool to localize energetic frustration in protein molecules, now with electrostatics. *Nucleic Acids Res.* **44**, W356-360
6. Tartaglia, G. G., and Vendruscolo, M. (2008) The Zyggregator method for predicting protein aggregation propensities. *Chem. Soc. Rev.* **37**, 1395-1401
